# Supplementary material for: Wnt5 controls splenic myelopoiesis and neutrophil functional ambivalency during DSS-induced colitis
Source: PubMed Central journal article supplement — Cell Rep. Author manuscript; Available in PMC 2024 May 2. (PMC11064424; doi:10.1016/j.celrep.2024.113934), 2024-03-08
Supplement: NIHMS1980940-supplement-1.pdf [file NIHMS1980940-supplement-1.pdf]

Cell Reports, Volume 43

## Supplemental information

### ***Wnt5* controls splenic myelopoiesis and neutrophil functional ambivalency during DSS-induced colitis**

**Yi Luan, Jiajia Hu, Qijun Wang, Xujun Wang, Wenxue Li, Rihao Qu, Chuan Yang, Barani Kumar Rajendran, Hongyue Zhou, Peng Liu, Ningning Zhang, Yu Shi, Yansheng Liu, Wenwen Tang, Jun Lu, and Dianqing Wu**

**Figure S1. Related to Figure 1**

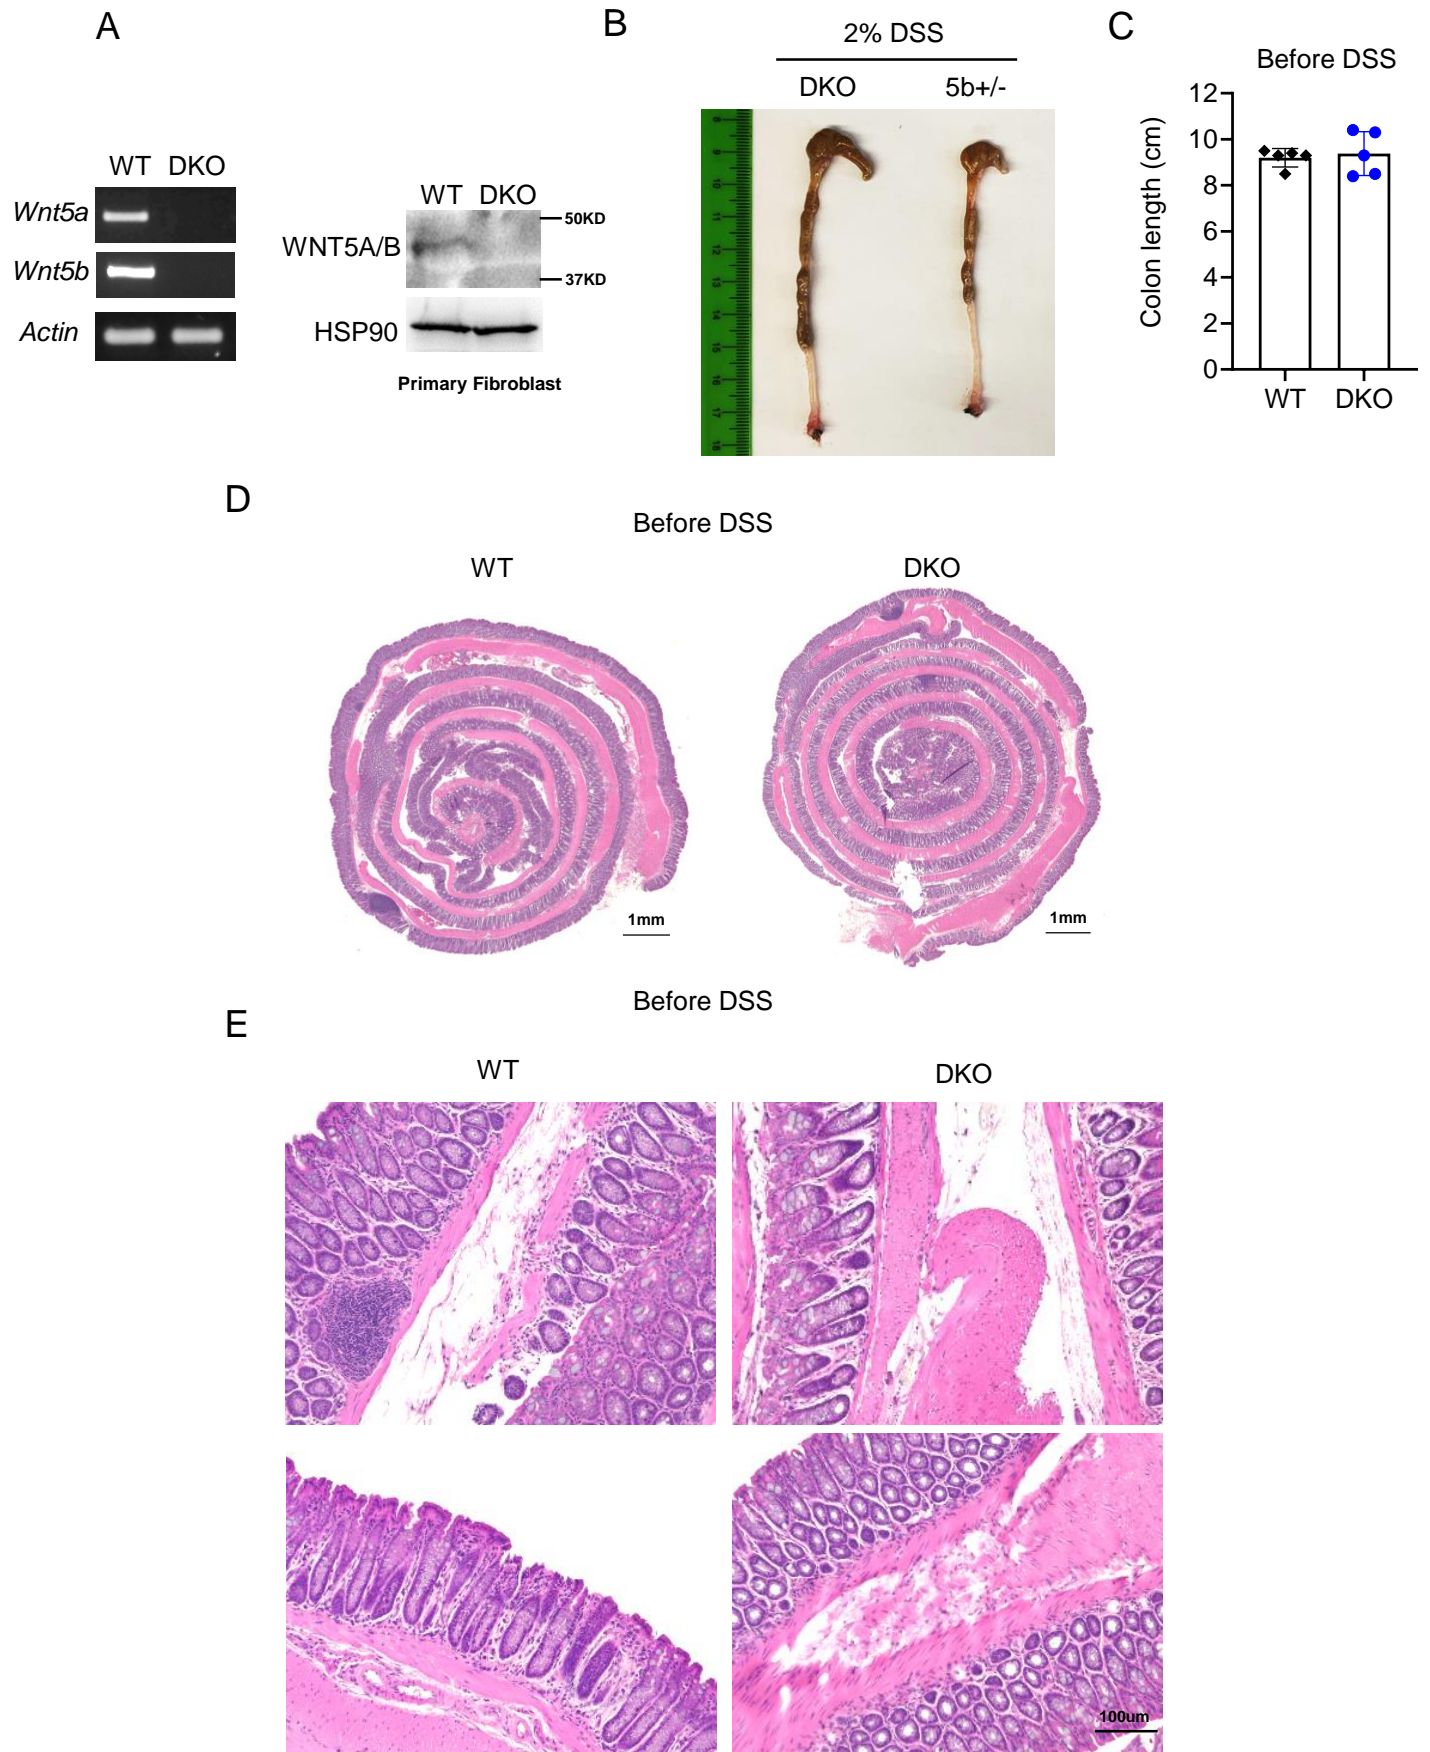

**Figure S1. Loss of WNT5 protects mice from DSS-induced colitis. Related to Figure 1.**

(A) RT-PCR and Western blot validation of *Wnt5a* and *Wnt5b* knockout efficiency. (B) Representative colons from DKO mice and control mice after 7-day DSS treatment are shown. (C-E) Colon length and H&E sections of colons from the DKO mice and control mice collected before DSS treatment are shown. Data in (C) are presented as means $\pm$ sem. Each datum point represents one mouse. Each independent experiment consists of at least three technical replicates.

**Figure S2. Related to Figure 2**

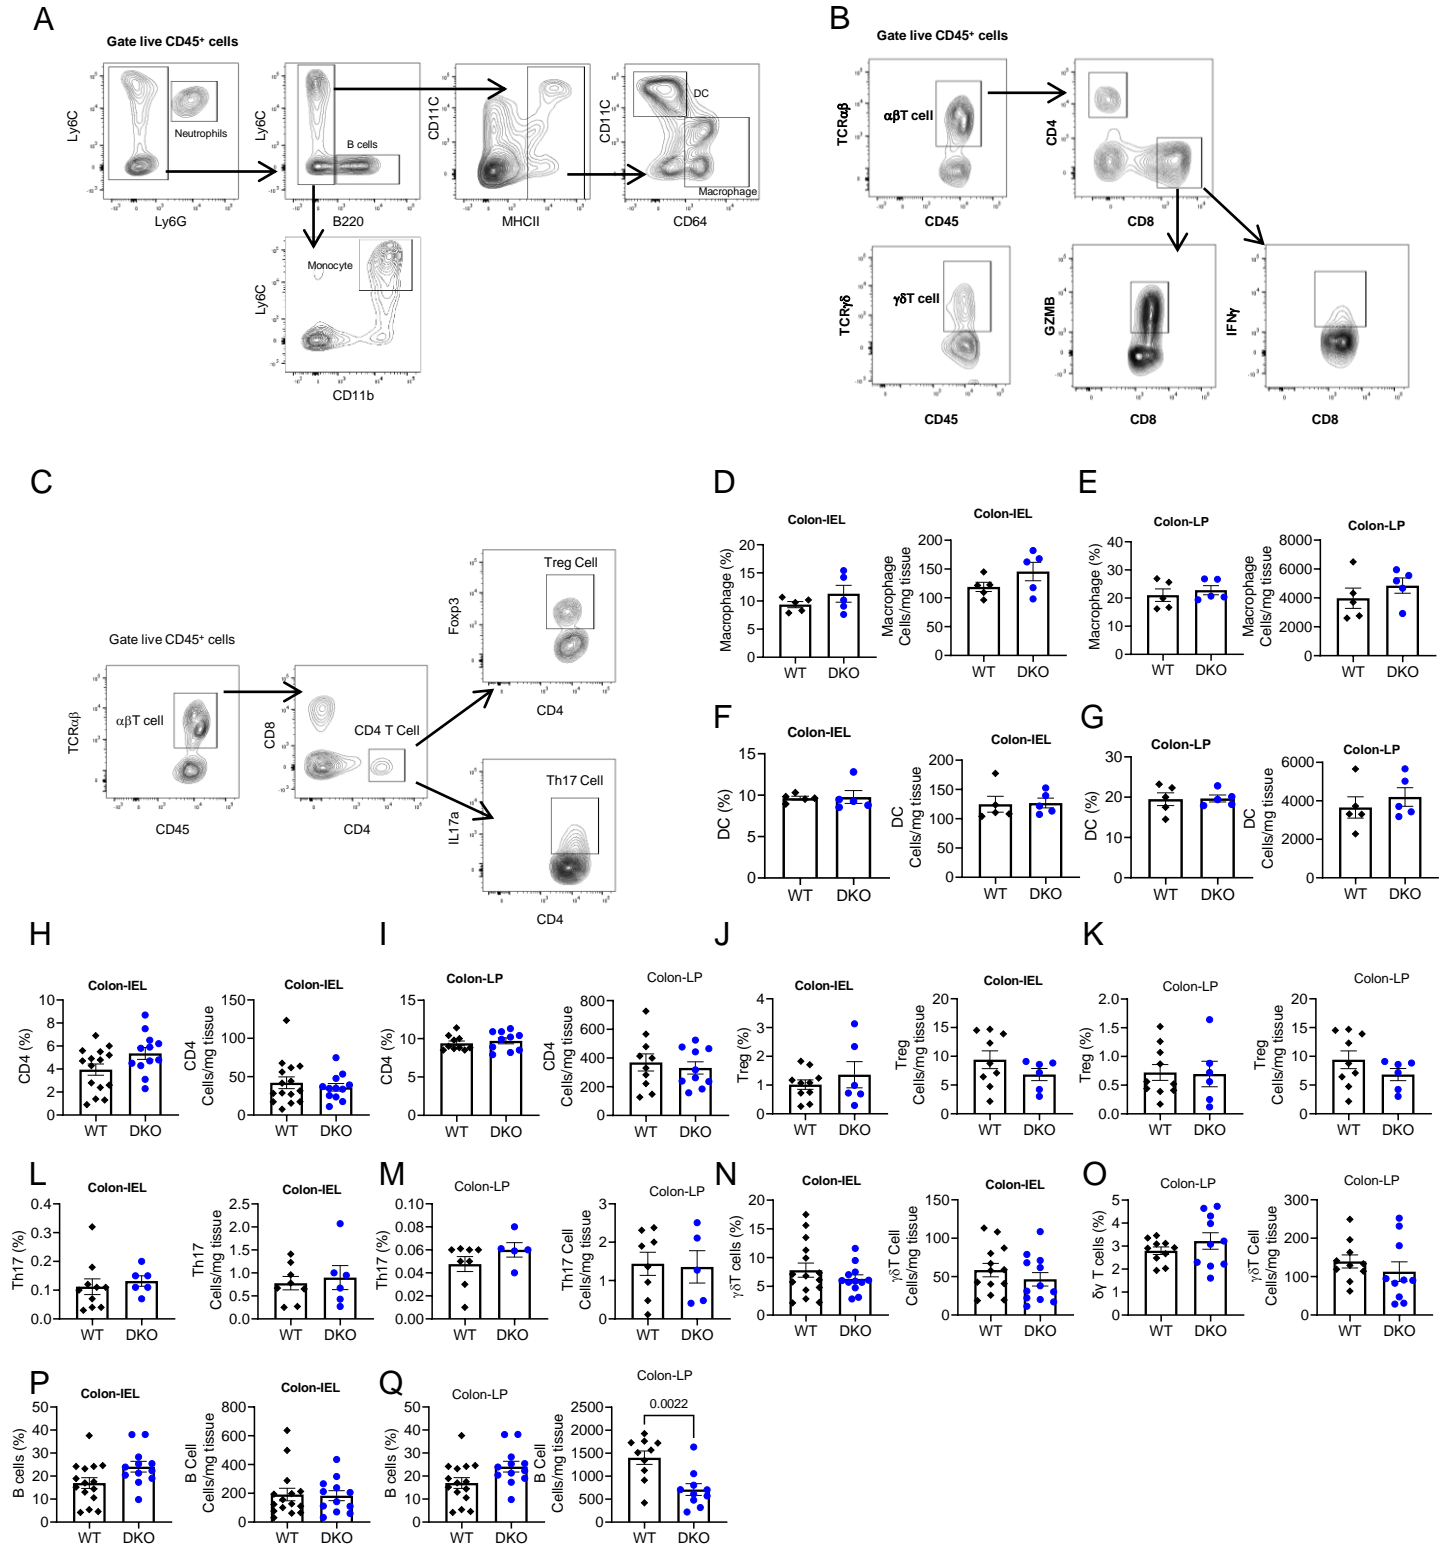

**Figure S2. Immune cell compositions in colitic colons of *Wnt5* DKO mice and control mice. Related to Figure 2.**

(A-C) Gating strategies for flow cytometry analysis of colon immune cells. (D-Q) Mice were treated as in Fig. 1, and percentage (in CD45<sup>+</sup>) and absolute number of various immune cell populations were determined by flow cytometry.

Data are shown as means $\pm$ SEM with P value (two-tailed Student's *t*-test). Each datum point represents one mouse.

Each independent experiment consists of at least three technical replicates.

**Figure S3. Related to Figure 3.**

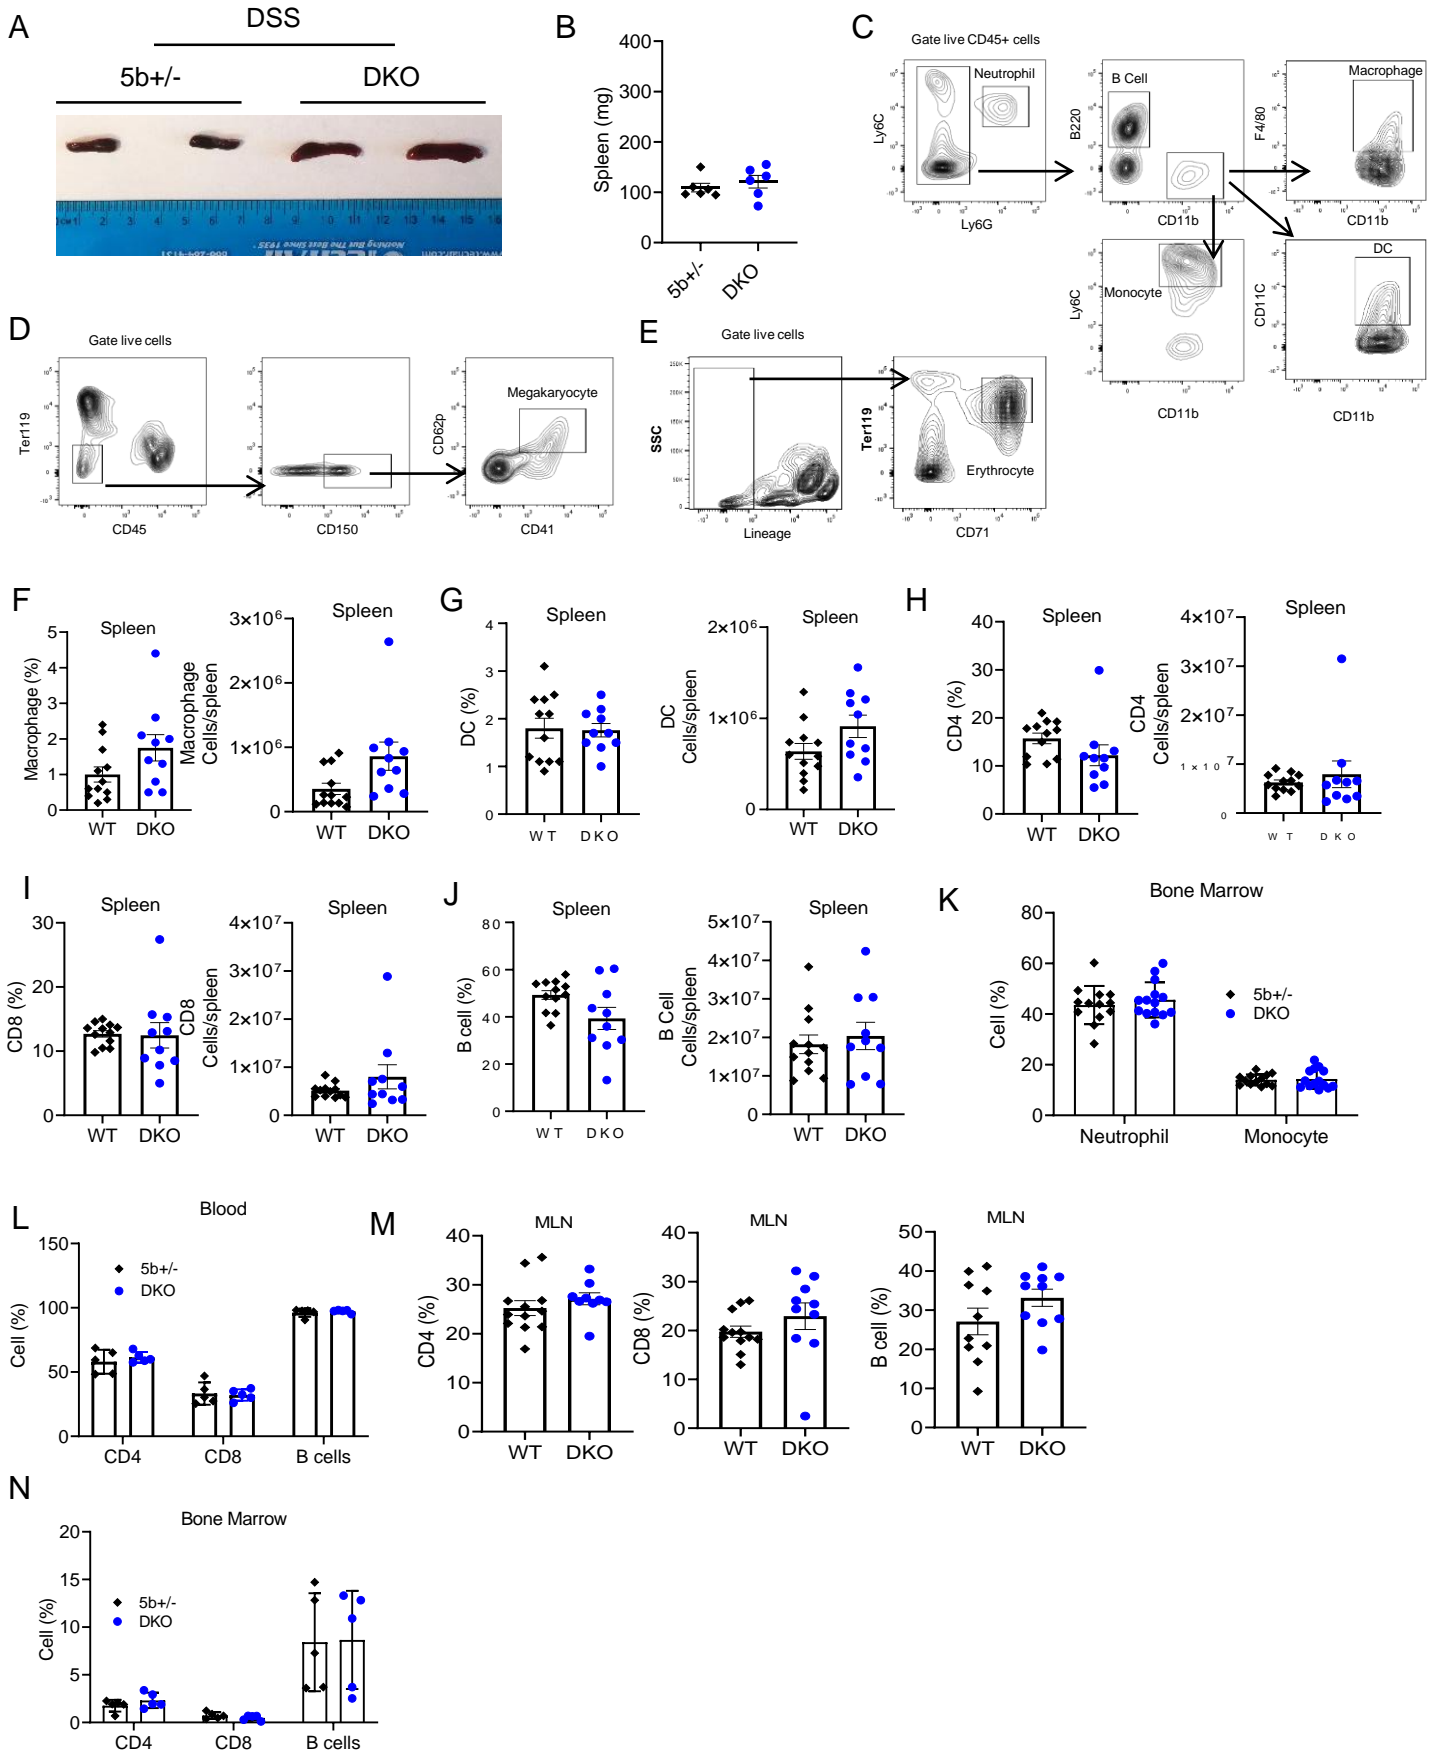

**Figure S3. Colitic *Wnt5* DKO mice develop splenomegaly. Related to Figure 3.**

(A) Representative images of spleens from the DKO mice and control mice on Day 7 of DSS treatment. (B) Spleen weight of *Wnt5* DKO mice and control mice without DSS treatment. (C-E) Flow cytometry gating strategies for the analysis in spleens. The same gating strategy was used for flow cytometry analysis of blood and MLN cells. (F-N) Mice were treated as in Figure 1, and the percentage (in CD45<sup>+</sup>) and the absolute number of immune cells were determined by flow cytometry. Results in (B, F-N) are presented as means $\pm$ sem with P value (two-tailed Student's *t*-test). Each datum point represents one mouse. Each independent experiment consists of at least three technical replicates.

**Figure S4. Related to Figure 4**

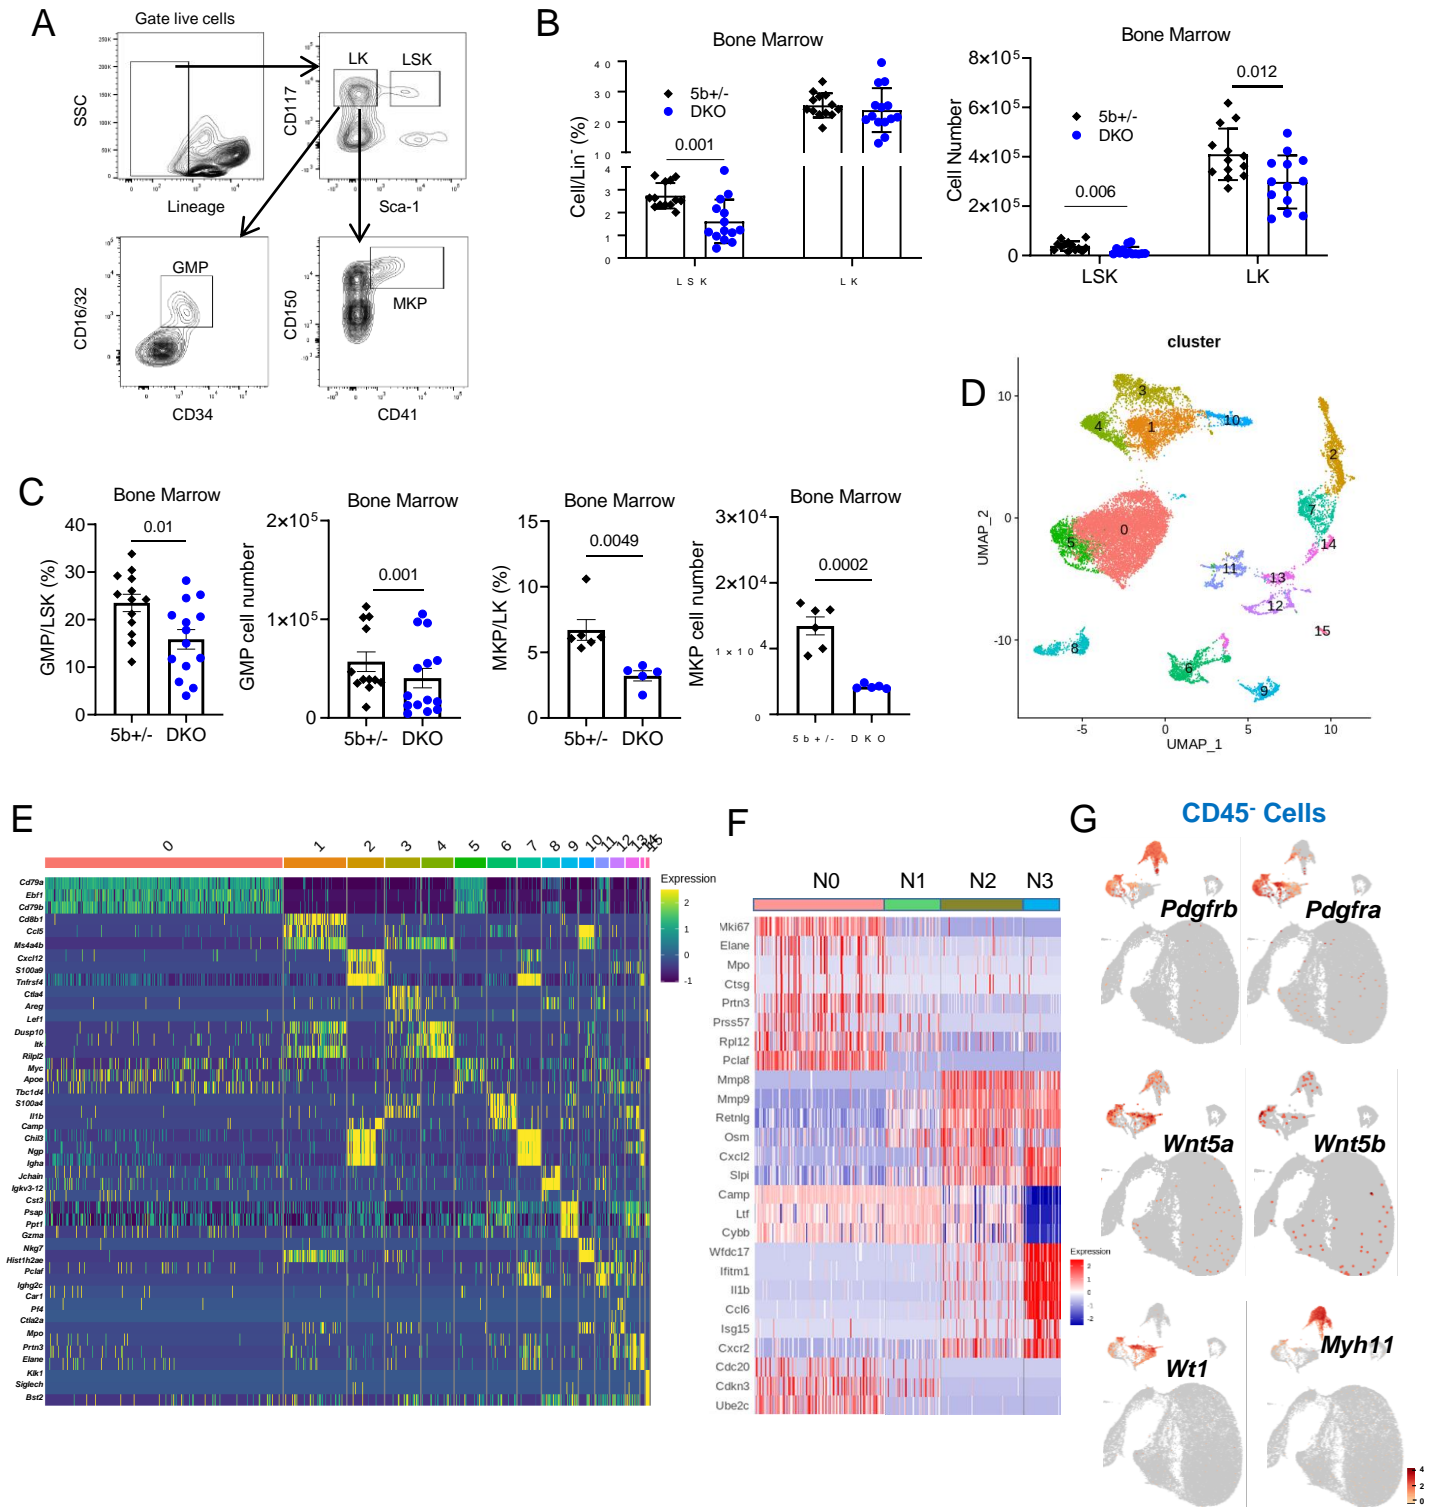



**Figure S4. *Wnt5* DKO mice enhance splenic extramedullary hematopoiesis upon colitis induction. Related to Figure 4.**

(A) Gating strategies for flow cytometry analysis of hematopoietic cell stem/progenitor populations during hematopoiesis in the bone marrow and spleen are shown. (B-G) Mice were treated as in Figure 1 and the percentage (in Lineage-) and the absolute number of LK and LSK (B), percentage (in LK) and absolute number of GMP and MKP (C) in the bone marrow were determined by flow cytometry. (D) UMAP plot of all of the splenic cells (21,745 in total) from DSS-treated WT mice and DKO mice that were analyzed by scRNA-seq and passed quality control. (E) The major DEGs among the clusters identified in (D). (F) The expression of neutrophil development marker genes in the subclusters. (G) WT mice and *Wnt5* DKO mice were treated as in Figure 1. Spleen CD45<sup>+</sup> cells were collected and subjected to single-cell RNA sequencing. Expression of *Pdgfra*, *Pdgfrb*, *Wnt5a*, *Wnt5b*, *Wt1*, and *Myh11* are shown. Results in (B-C) are shown as means  $\pm$  sem with P values (two-tailed Student's *t*-test). Each datum point represents one mouse. Each independent experiment consists of at least three technical replicates.

**Figure S5. Related to Figure 5**

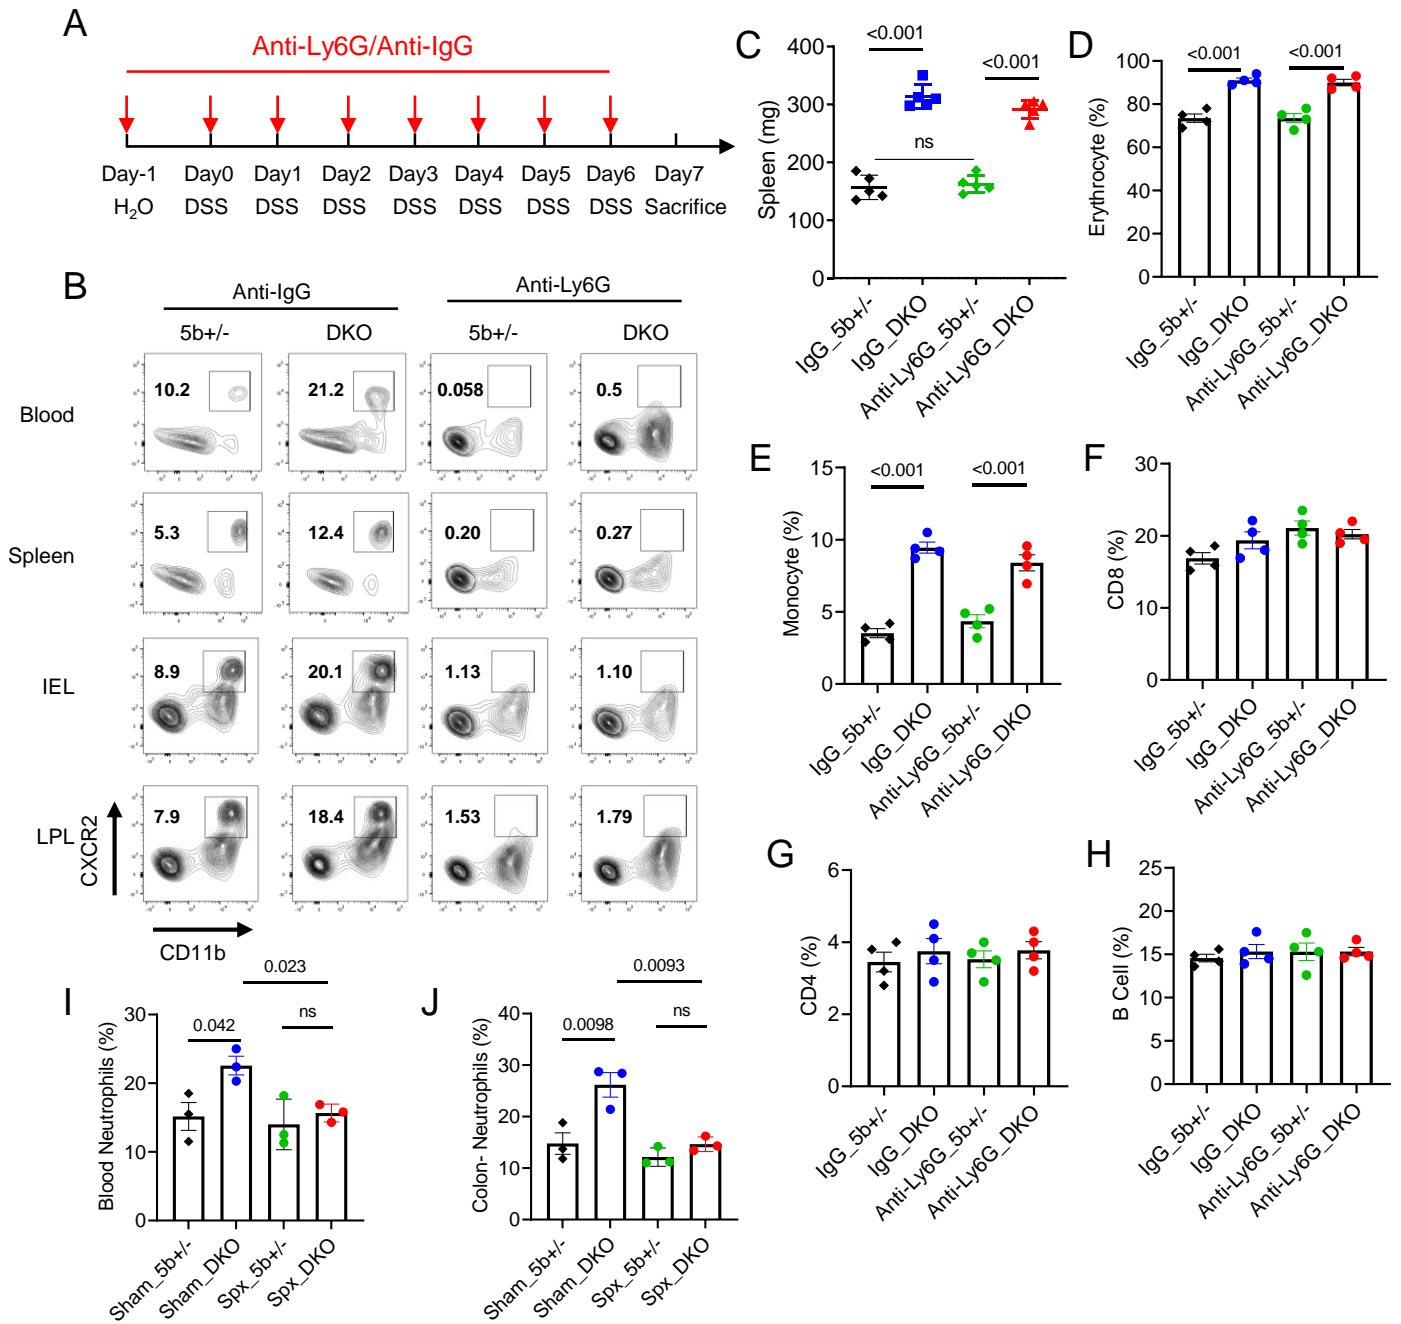

**Figure S5. Colitic phenotypes of *Wnt5* DKO mice depend on neutrophils and spleens. Related to Figure 5.**

(A) Schematic representation of the procedure used to deplete neutrophils in the *Wnt5* DKO mice and control mice subjected to DSS-induced colitis. (B-H) *Wnt5* DKO mice and the control mice were treated with DSS and subjected to neutrophil depletion as in A. Neutrophil depletion efficiency in various tissues is shown in (B), and spleen weight is shown in (C). The frequencies of erythrocytes (in CD45<sup>-</sup>) and monocytes (in CD45<sup>+</sup>) in the spleen are shown in (D) and (E). The frequencies of CD8<sup>+</sup> T cells, CD4<sup>+</sup> T cells, and B cells (in CD45<sup>+</sup>) in the colon are shown in (F-H). (I-J) *Wnt5* DKO mice and the control mice were subjected to splenectomy before being treated with DSS. The frequencies of neutrophils (in CD45<sup>+</sup>) in the blood and colon are shown in (I) and (J). Data in (C-J) are presented as means $\pm$ sem with P values (two-tailed two-way ANOVA). Each datum point represents one mouse. Each independent experiment consists of at least three technical replicates.

**Figure S6. Related to Figure 6**

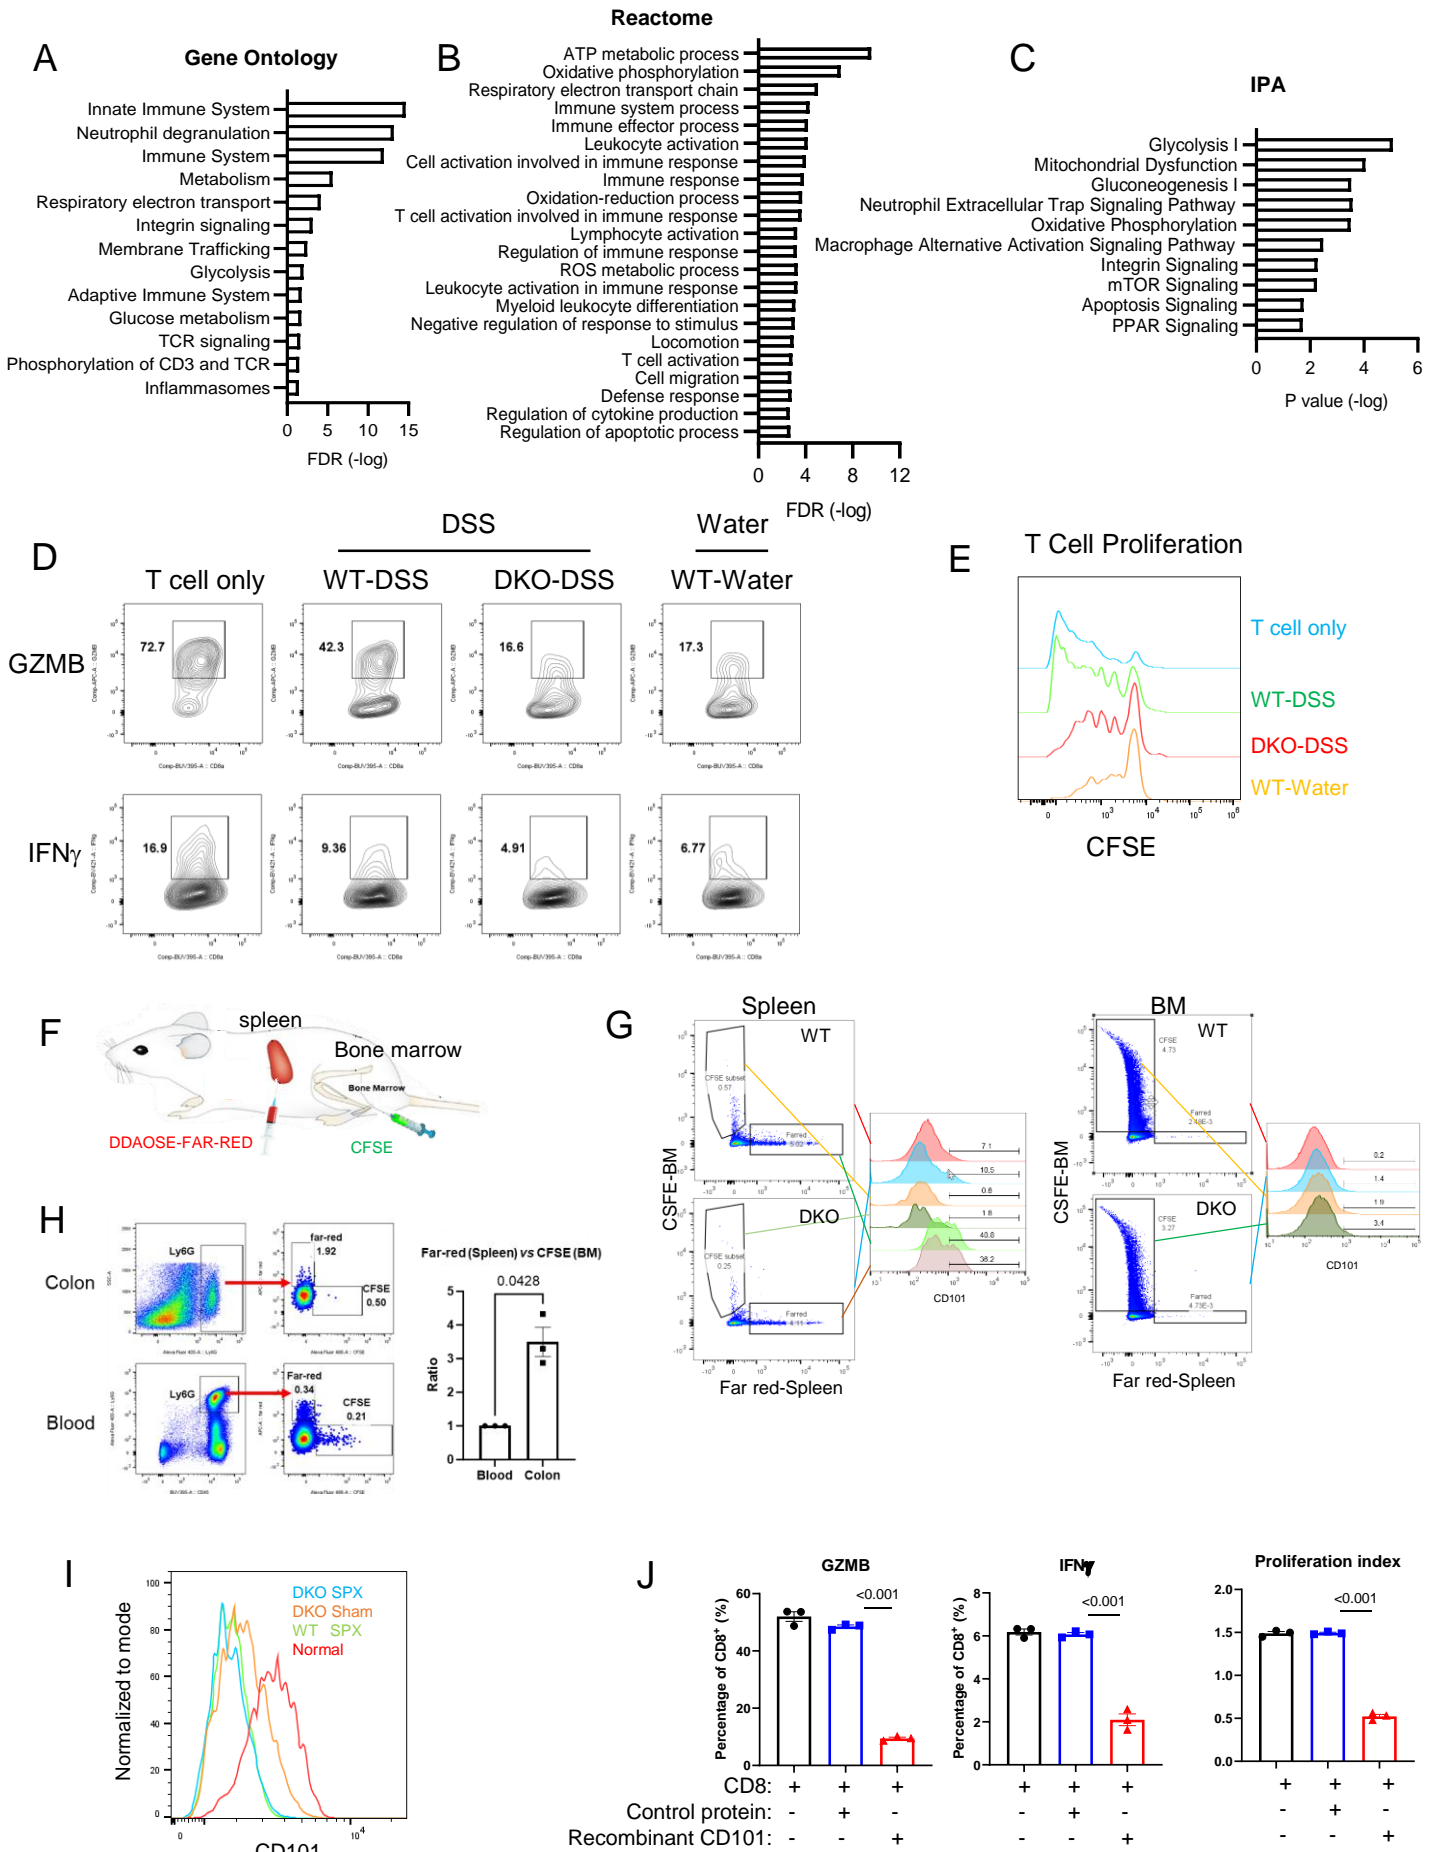

**Figure S6. Colitic *Wnt5* DKO mice produce CD101-high hyper-immunosuppressive neutrophils from the spleen. Related to Figure 6.**

(A-C) Gene Ontology, Reactome, and IPA pathway analysis of common DEGs identified from both transcriptomic and proteomic analyses of blood neutrophils. (D-E) Representative flow cytometry gating and charts for Fig. 6C-E. (F). Schematic representation of the cell tracing experiment. (G) Cell tracing experiment was performed as in Fig.6J. CD101 expression in dye-labeled BM and spleen cells is shown. (H) Cell tracing experiment was performed as in Fig.6J. The infiltration of dye-labeled BM and spleen neutrophils was shown in the inflamed colon. (I) WT mice and DKO mice were subjected to splenectomy and sham surgery, and CD101 expression in blood neutrophils was determined by flow cytometry. (J) Splenic CD8<sup>+</sup> T cells were activated by anti-CD3/CD28 in the presence or absence of the CD101 recombinant protein. GZMB, IFN $\gamma$ , and T cell expansion were determined by flow cytometry. Figures in (H) and (J) are presented as means $\pm$ sem with P values (two-tailed Student's *t*-test). Each independent experiment consists of at least three technical replicates.

**Figure S7. Related to Figure 7**

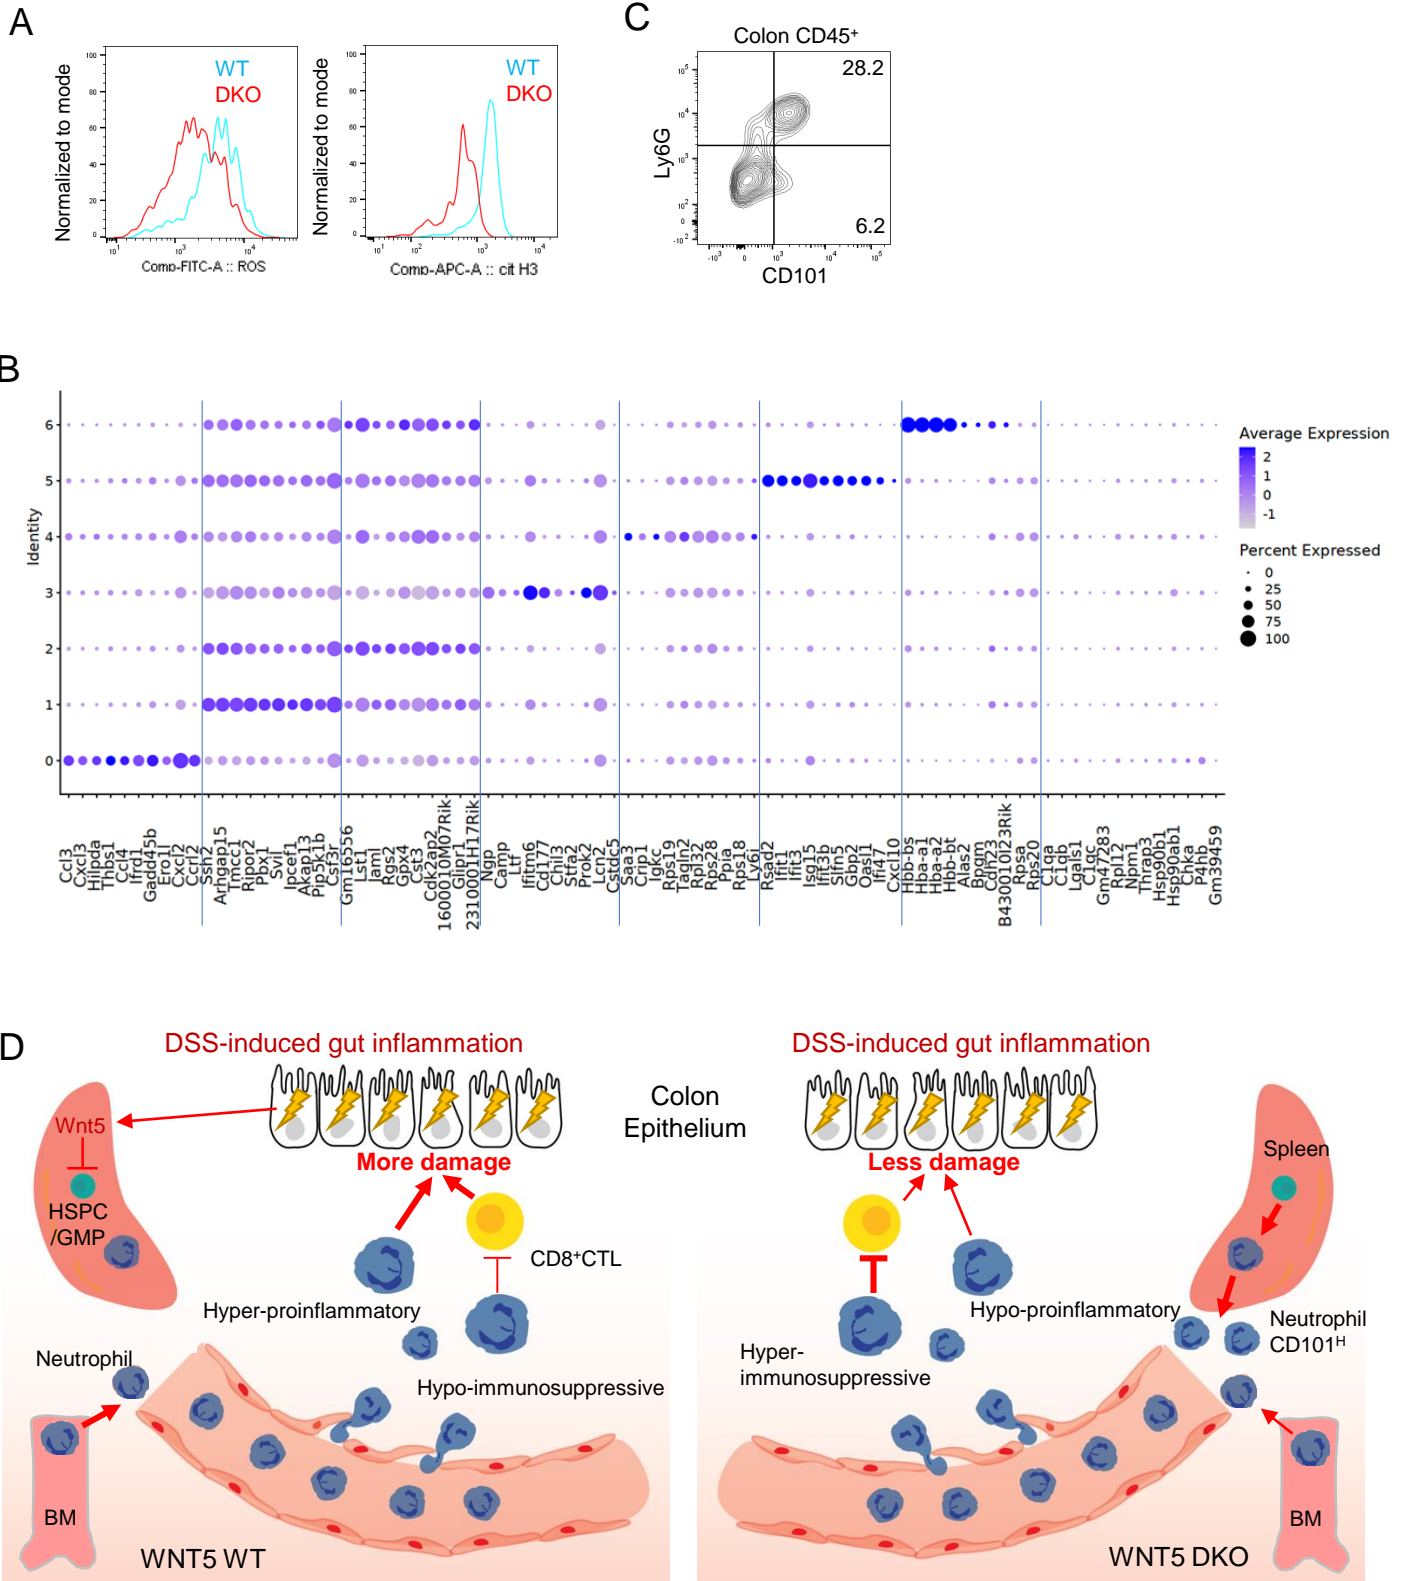

**Figure S7. Transcriptomic profiles of blood neutrophils inform the functions of colon neutrophils. Related to Figure 7.**

(A) Representative flow cytometry charts of ROS and citrullinated histone determination for Fig. 7B. (B) Signature genes of the subclusters shown in Fig. 7B. (C) CD101 expression in Ly6G<sup>+</sup> and Ly6G<sup>-</sup> cells of DKO-DSS colon CD45<sup>+</sup> cells were determined by flow cytometry. (D) Graphic summary. The loss of WNT5 proteins in DSS-treated mice leads to splenomegaly, EMH, and generation of neutrophils in spleens with heightened suppressive activity toward cytotoxic CD8<sup>+</sup> T cells and reduced pro-inflammatory activities. These splenic neutrophils help to protect mice from DSS-induced colitis. Each independent experiment consists of at least three technical replicates.
